# Supplementary material for: Assessing Chemical Constituents of Mimosa caesalpiniifolia Stem Bark: Possible Bioactive Components Accountable for the Cytotoxic Effect of M. caesalpiniifolia on Human Tumour Cell Lines
Source: PubMed Central journal article supplement (PMC6272184; doi:10.3390/molecules20034204), 2015-03-05
Supplement: molecules-20-04204-s001.pdf [file molecules-20-04204-s001.pdf]

## Supplementary Materials

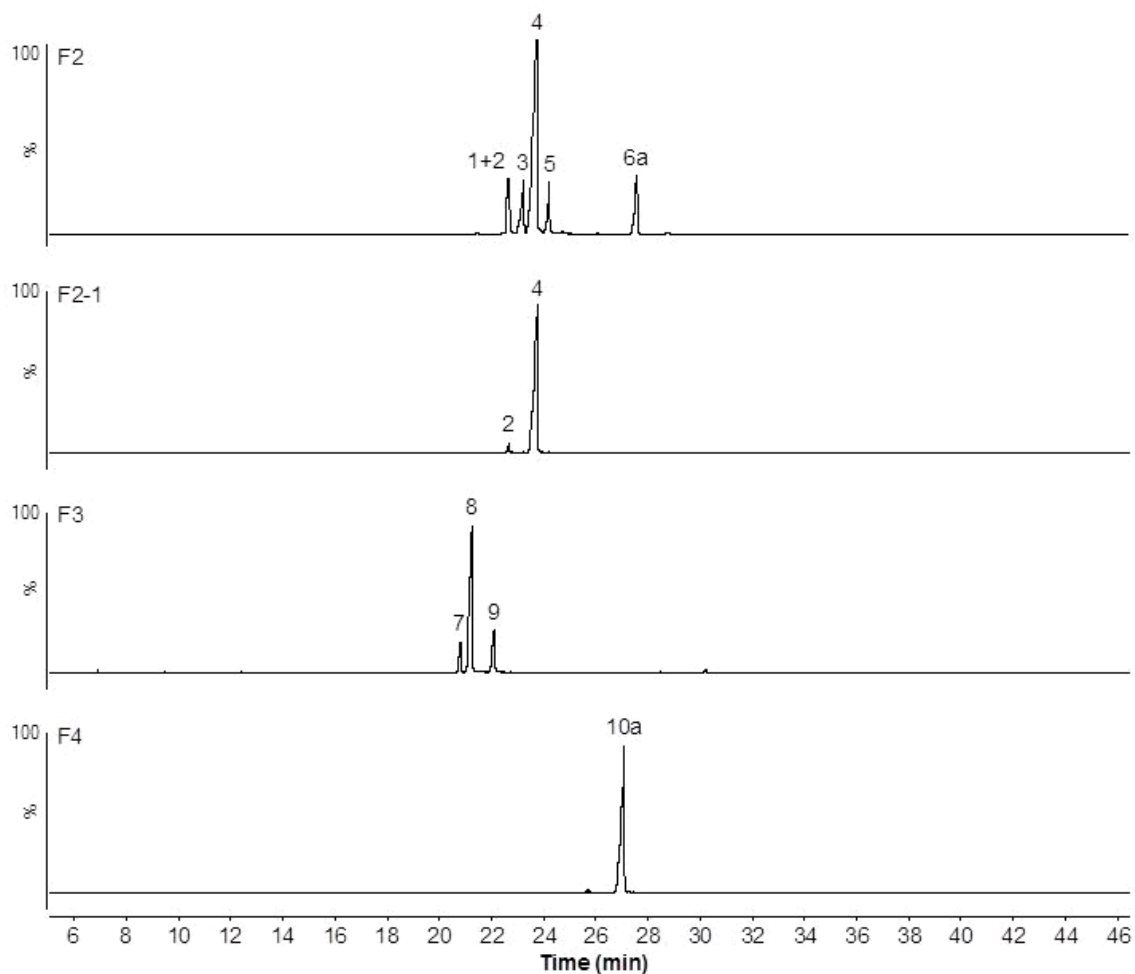

**Figure S1.** Total ion chromatogram (TIC) of the subfractions (F2, F2-1, F3 and F4) of silica gel CC hexane fraction of *Mimosa caesalpinifolia* by GC-qMS analysis. F2: campestenone (**1**),  $\beta$ -amyrin (**2**), stigmasta-4,22-dien-3-one (**3**), lupeol (**4**), sitostenone (**5**), 3 $\beta$ -O-acetyl-olean-18-en-28-oic acid methyl ester (**6a**). F2-1:  $\beta$ -amyrin (**2**), lupeol (**4**). F3: campesterol (**7**), stigmasterol (**8**), sitosterol (**9**). F4: betulinic acid methyl ester (**10a**). \*GC-qMS analysis - GC oven temperature: 200 °C (4 min) at 6 °C min<sup>-1</sup> to 290 °C (15 min) at 2 °C min<sup>-1</sup> to 305 °C (5 min) and solvent delay time: 5 min.

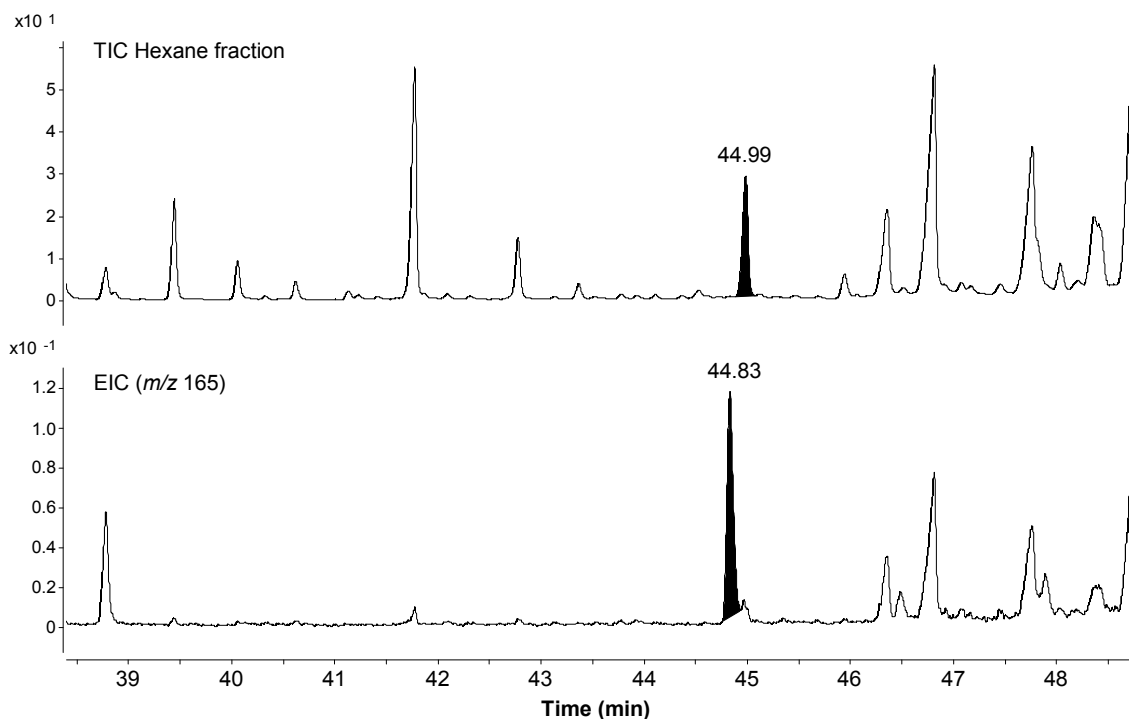

**Figure S2.** Total ion chromatogram (TIC) and extracted ion chromatogram (EIC)  $m/z$  165 of hexane fraction from ethanolic stem bark extract of *Mimosa caesalpinifolia*. Peak at 44.99 min: methyl octacosanoate ( $[M^{+}]$ : 438). Peak at 44.83 min:  $\alpha$ -tocopherol ( $[M^{+}]$ : 430).

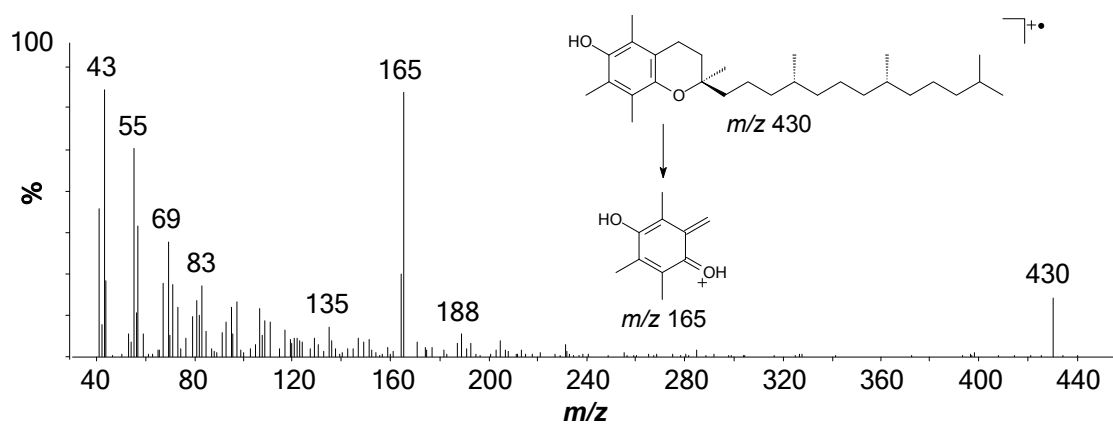

**Figure S3.** Mass spectra of  $\alpha$ -tocopherol (EIMS  $[M^{+}]$ : 430) and assignment of the ion fragment  $m/z$  165  $[C_{10}H_{13}O_2]^+$ .

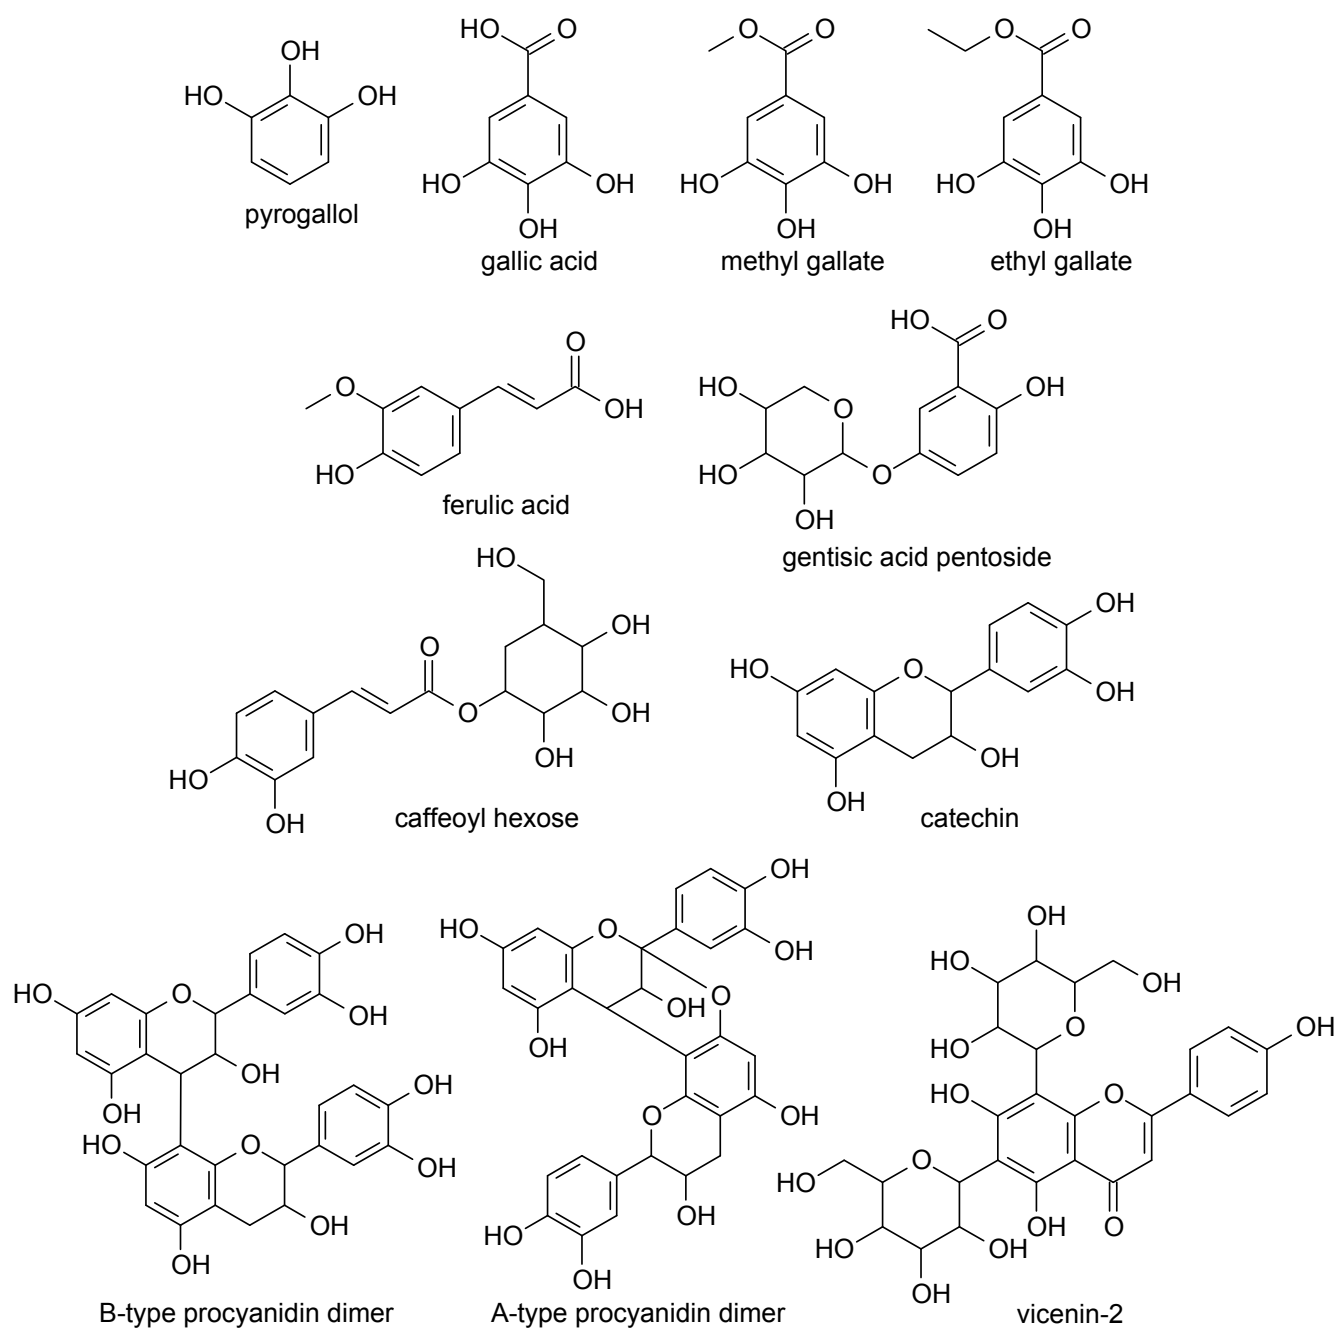

**Figure S4.** Chemical constituents identified in the EtOH extract of *Mimosa caesalpinifolia* stem bark by ESI(-)-LTQ-Orbitrap-MS.
